# Supplementary material for: Have female twisted-wing parasites (Insecta: Strepsiptera) evolved tolerance traits as response to traumatic penetration?
Source: PeerJ. 2022 Aug 16;10:e13655. doi: 10.7717/peerj.13655 (PMC9390352; doi:10.7717/peerj.13655)
Supplement: Supplemental Information 6 [file peerj-10-13655-s006.xlsx]

## Sheet: Stylops_Wounding site
Sample_ID	zero value	Measured Force in mN	Penetration_Force in mN	Critical stress in GPa
StOv_12_01_01	-6.62081	2.67229	9.2931	0.377307
StOv_12_01_02	-6.83583	7.11551	13.9513	0.566435
StOv_12_01_03	-6.77043	5.65872	12.4291	0.504633
StOv_12_01_05	-6.64396	4.10478	10.7487	0.436407
StOv_12_02_01	-6.64074	3.80811	10.4489	0.424231
StOv_12_02_02	-6.44392	6.27865	12.7226	0.516546
StOv_12_03_01	-6.35298	4.13316	10.4861	0.425745
StOv_12_03_02	-6.57215	4.66262	11.2348	0.45614
StOv_12_03_03	-6.64789	5.68384	12.3317	0.500677
StOv_13_01_03	-6.23644	-1.26201	4.97443	0.201966
StOv_13_02_03	-5.7672	10.2846	16.0518	0.651717
StOv_13_02_04	-6.01961	7.15809	13.1777	0.535025
StOv_13_02_05	-6.08013	-1.47779	4.60234	0.186858
StOv_13_03_02	-5.81924	1.71443	7.53367	0.305873
StOv_13_03_04	-5.80923	-1.24138	4.56785	0.185458
StOv_14_01	-4.90706	3.15746	8.06452	0.327426
StOv_14_02	-4.59397	3.8153	8.40927	0.341423
StOv_14_03	-4.70882	7.10622	11.815	0.479699
StOv_14_04	-4.67136	3.47651	8.14787	0.33081
StOv_15_01	-4.45887	3.84135	8.30022	0.336995
StOv_15_03	-4.47861	-3.38266	1.09595	0.0444964
StOv_15_04	-4.03369	5.73898	9.77267	0.396778
StOv_16_02	-4.28264	7.40538	11.688	0.474542
StOv_16_04	-4.53655	7.79358	12.3301	0.500613
StOv_17_01	-4.22221	8.76371	12.9859	0.527238
StOv_17_03	-4.21359	8.53093	12.7445	0.517437
StOv_17_04	-4.31517	8.48082	12.796	0.519527
StOv_18_01	-3.93997	4.94827	8.88824	0.360869
StOv_18_03	-4.25668	0.25178	4.50846	0.183047
StOv_18_04	-4.20512	7.00567	11.2108	0.455166

## Sheet: Stylops_Control site
Sample_ID	zero value	Measured Force in mN	Penetration_Force in mN	Critical stress in GPa
StOv_19_01	-4.02821	4.45453	8.48274	0.344406
StOv_19_02	-3.09117	2.20067	5.29184	0.214853
StOv_19_03	-3.75116	2.2089	5.96006	0.241983
StOv_19_04	-3.8077	0.96815	4.77585	0.193903
StOv_20_01	-3.69131	-1.0444	2.64691	0.107467
StOv_20_02	-3.72444	2.12059	5.84503	0.237313
StOv_20_03	-3.72849	1.61895	5.34744	0.21711
StOv_20_04	-3.63256	1.11193	4.74449	0.19263
StOv_21_01	-2.84711	2.23822	5.08533	0.206468
StOv_21_02	-3.55288	3.0489	6.60178	0.268037
StOv_21_03	-3.5835	1.32769	4.91119	0.199398
StOv_21_04	-3.63244	1.12563	4.75807	0.193181
StOv_22_01	-4.45544	-0.20171	4.25373	0.172705
StOv_22_02	-4.58477	-2.14067	2.4441	0.0992323
StOv_22_03	-4.59514	-1.50241	3.09273	0.125567
StOv_22_04	-4.64904	-1.41545	3.23359	0.131286
StOv_23_01	-4.42853	2.23188	6.66041	0.270418
StOv_23_02	-4.62816	0.08471	4.71287	0.191346
StOv_23_04	-4.59696	-0.43289	4.16407	0.169064
StOv_24_01_01	-4.33161	0.77915	5.11076	0.207501
StOv_24_01_02	-4.53888	-0.76783	3.77105	0.153107
StOv_24_01_03	-4.53405	-0.73738	3.79667	0.154148
StOv_24_01_04	-4.55424	-1.9721	2.58214	0.104837
StOv_24_02_01	-3.99858	0.96754	4.96612	0.201628
StOv_24_02_02	-4.32661	-0.16647	4.16014	0.168905
StOv_24_02_03	-4.412	1.33323	5.74523	0.233261
StOv_24_02_04	-4.47784	0.47188	4.94972	0.200962
StOv_25_01	-4.26177	3.2182	7.47997	0.303692
StOv_25_02	-4.31212	1.20764	5.51976	0.224106
StOv_25_03	-4.28556	0.77546	5.06102	0.205481
StOv_25_04	-4.29191	1.43883	5.73074	0.232672
StOv_26_01	-4.1654	0.12534	4.29074	0.174207
StOv_26_02	-4.25387	-0.9274	3.32647	0.135057
StOv_26_03	-4.30072	-0.0889	4.21182	0.171003
StOv_26_04	-4.27394	-0.23296	4.04098	0.164067
StOv_27_01	-4.07171	-1.53713	2.53458	0.102906
StOv_27_02	-4.24211	0.16228	4.40439	0.178822
StOv_27_03	-4.22741	-2.38647	1.84094	0.0747435
StOv_27_04	-4.25513	1.16264	5.41777	0.219966
StOv_27_05	-4.16799	-3.00704	1.16095	0.0471354

## Sheet: Xenos_Wounding site
Sample_ID	zero value	Measured Force in mN	Penetration_Force in mN	Critical stress in GPa
XeVe_02_01	-5.68407	-0.67254	5.01153	0.372289
XeVe_02_02	-5.66752	-1.50906	4.15846	0.308917
XeVe_02_03	-5.65988	-1.42619	4.23369	0.314506
XeVe_07_01	-5.65858	1.38324	7.04182	0.523112
XeVe_07_02	-5.65427	-0.78575	4.86852	0.361665
XeVe_07_03	-5.63863	-0.44763	5.191	0.385621
XeVe_09_01	-5.73467	-0.87772	4.85695	0.360805
XeVe_09_02	-5.71352	-2.21931	3.49421	0.259572
XeVe_09_03	-5.70761	-2.09699	3.61062	0.26822
XeVe_12_01	-5.69637	-1.65505	4.04132	0.300215
XeVe_12_02	-5.68065	-1.74975	3.9309	0.292012
XeVe_12_03	-5.66064	-2.69281	2.96783	0.220469
XeVe_12_04	-5.65229	-1.10658	4.54571	0.337685
XeVe_13_01	-5.66314	-2.43633	3.22681	0.239708
XeVe_13_02	-5.64728	-2.58233	3.06495	0.227684
XeVe_13_03	-5.62852	-2.07726	3.55126	0.26381
XeVe_14_01	-5.62411	-0.62124	5.00287	0.371645
XeVe_14_02	-5.61423	-1.45382	4.16041	0.309062
XeVe_14_03	-5.60325	-0.96059	4.64266	0.344887
XeVe_17_01_01	-5.68381	-1.8997	3.78411	0.281108
XeVe_17_01_02	-5.66627	-2.16012	3.50615	0.260459
XeVe_17_01_03	-5.65914	-3.2689	2.39024	0.177562
XeVe_17_01_04	-5.612	-2.39342	3.21858	0.239097
XeVe_18_01	-5.71585	-1.87997	3.83588	0.284954
XeVe_18_02	-5.70802	-1.66689	4.04113	0.300201
XeVe_18_03	-5.69954	-1.76948	3.93006	0.29195
XeVe_20_02_01	-5.71676	-3.59641	2.12035	0.157513
XeVe_20_02_02	-5.69979	-2.93745	2.76234	0.205204
XeVe_20_02_03	-5.6913	-3.25707	2.43423	0.18083
XeVe_22_01_01	-5.71185	-2.7007	3.01115	0.223688
XeVe_22_01_02	-5.70484	-2.49552	3.20932	0.238409
XeVe_22_01_03	-5.71932	-3.24523	2.47409	0.183791
XeVe_22_02_01	-5.72627	-2.63757	3.0887	0.229448
XeVe_22_02_02	-5.72095	-3.00848	2.71247	0.2015
XeVe_22_02_03	-5.71914	-3.22155	2.49759	0.185537
XeVe_24_01	-5.76662	-3.2689	2.49772	0.185547
XeVe_24_02	-5.64035	-2.04964	3.59071	0.266741
XeVe_24_03	-5.63467	-2.92561	2.70906	0.201246

## Sheet: Xenos_Controll site
Sample_ID	zero value	Measured Force in mN	Penetration_Force in mN	Critical stress in GPa
XeVe_02_R01	-5.6514	-2.1325	3.5189	0.261406
XeVe_02_R02	-5.6493	-3.8371	1.8122	0.134622
XeVe_02_R03	-5.6425	-4.13699	1.50551	0.111839
XeVe_07_R01	-5.63359	-3.78975	1.84384	0.136972
XeVe_07_R02	-5.63286	-0.57389	5.05897	0.375813
XeVe_07_R03	-5.62729	-4.56708	1.06021	0.0787592
XeVe_09_R01	-5.70269	-3.81737	1.88532	0.140054
XeVe_09_R02	-5.69832	-3.90418	1.79414	0.13328
XeVe_09_R03	-5.68701	-4.58066	1.10635	0.0821868
XeVe_12_R01	-5.64417	-3.84467	1.7995	0.133678
XeVe_12_R02	-5.63889	-2.96507	2.67382	0.198629
XeVe_12_R03	-5.63359	-3.40306	2.23053	0.165698
XeVe_13_R01	-5.62892	-4.85513	0.77379	0.0574821
XeVe_13_R02	-5.62378	-4.63811	0.98567	0.0732219
XeVe_13_R03	-5.61573	-4.90248	0.71325	0.0529848
XeVe_14_R01	-5.59889	-2.2785	3.32039	0.24666
XeVe_14_R02	-5.59087	-2.49946	3.09141	0.22965
XeVe_14_R03	-5.58935	-2.58627	3.00308	0.223088
XeVe_17_01_R01	-5.64593	-4.96167	0.68426	0.0508312
XeVe_17_01_R02	-5.54533	-2.87432	2.67101	0.19842
XeVe_17_01_R03	-5.64173	-2.85459	2.78714	0.207047
XeVe_18_R01	-5.69276	-4.4566	1.23616	0.0918299
XeVe_18_R02	-5.69133	-4.61838	1.07295	0.0797056
XeVe_18_R03	-5.68625	-3.39912	2.28713	0.169903
XeVe_20_02_R01	-5.68408	-4.52368	1.1604	0.086202
XeVe_20_02_R02	-5.68453	-2.41266	3.27187	0.243056
XeVe_20_02_R03	-5.67523	-4.43293	1.2423	0.092286
XeVe_22_01_R01	-5.69703	-4.95378	0.74325	0.0552134
XeVe_22_01_R02	-5.69915	-4.78411	0.91504	0.067975
XeVe_22_01_R03	-5.69336	-1.91153	3.78183	0.280939
XeVe_22_02_R01	-5.71775	-3.11502	2.60273	0.193347
XeVe_22_02_R02	-5.71454	-3.72662	1.98792	0.147675
XeVe_22_02_R03	-5.7103	-5.00113	0.70917	0.0526817
XeVe_24_R01	-5.62341	-4.40925	1.21416	0.0901956
XeVe_24_R02	-5.61273	-3.60035	2.01238	0.149493
XeVe_24_R03	-5.62095	-2.07331	3.54764	0.263541
